# Supplementary material for: A disposable electrochemical caffeine sensor based on a screen-printed electrode modified with a copper-metal organic framework and functionalized multi-walled carbon nanotube nanocomposite
Source: Royal Society of Chemistry journal article supplement (doi:10.1039/d3nj05570a), 2024-01-01
Supplement: d3nj05570a1.pdf [file d3nj05570a1.pdf]

## Supplementary Information

### **Disposable electrochemical caffeine sensor based on screen-printed electrode modified with copper-metal organic framework and functionalized multi-walled carbon nanotubes nanocomposite**

Muktinan Saraban,<sup>a, b, c</sup> Apon Numnuam,<sup>a, b, c</sup> Natha Nontipichet,<sup>a</sup> Tawatchai Kangkamano,<sup>d</sup> Panote Thavarungkul,<sup>a, b, c</sup> Proespichaya Kanatharana<sup>a, b, c</sup> and Suntisak Khumngern<sup>\*a, b</sup>

<sup>a</sup>*Center of Excellence for Trace Analysis and Biosensor, Prince of Songkla University, Hat Yai, Songkhla 90110, Thailand*

<sup>b</sup>*Division of Physical Science, Faculty of Science, Prince of Songkla University, Hat Yai, Songkhla 90110, Thailand*

<sup>c</sup>*Center of Excellence Innovation in Chemistry, Faculty of Science, Prince of Songkhla University, Hat Yai, Songkhla 90110, Thailand*

<sup>d</sup>*Division of Chemistry, Faculty of Science, Thaksin University, Phatthalung Campus, Paphayom, Phatthalung 93110, Thailand*

<sup>\*</sup>*E-mail: [suntisak.k@psu.ac.th](mailto:suntisak.k@psu.ac.th)*

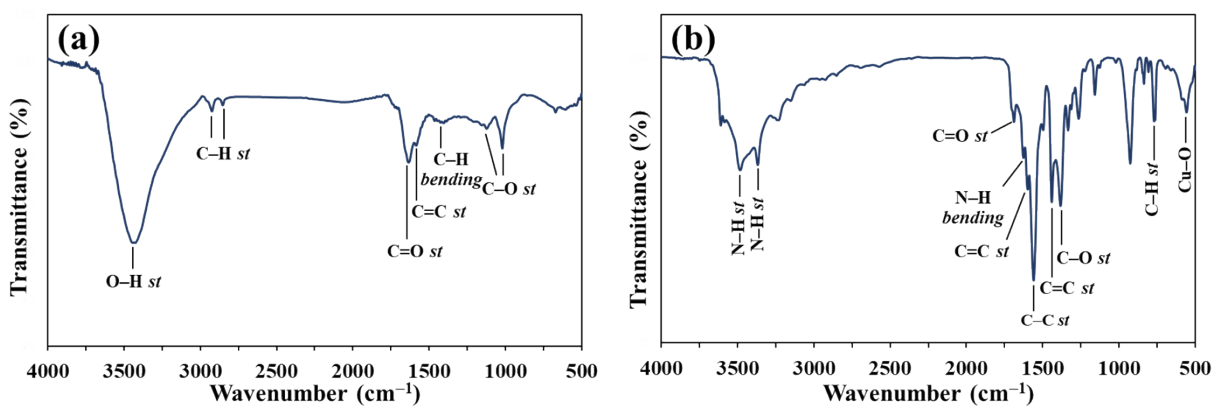

Fig S1. Fourier-transform infrared spectra are of (a) f-MWCNTs and (b) Cu-MOF.

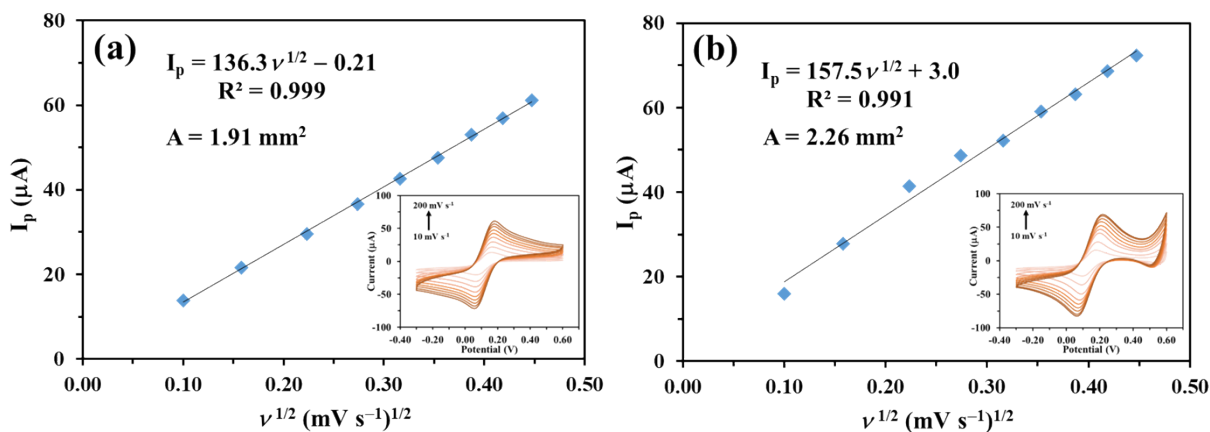

Fig S2. The linear relations between the anodic peak current and the square root of the scan rate are of (a) the f-MWCNTs/SPE and (b) the Cu-MOF@f-MWCNTs/SPE. The insets show the CV responses produced in 5.0 mM  $\text{K}_3\text{Fe}(\text{CN})_6$  containing 0.10 M KCl at different scan rates from 10 – 200  $\text{mV s}^{-1}$ .
